# Supplementary material
Source: PubMed Central journal article supplement (PMC6645156)

## Selective Synthesis of (Benzyl)biphenyls by Successive Suzuki-Miyaura Coupling of Phenylboronic Acids with 4-Bromobenzyl Acetate under Air Atmosphere

Masato Ohsumi\*<sup>†</sup> and Nagatoshi Nishiwaki\*<sup>‡§</sup>

<sup>†</sup>Kochi National College of Technology, Nankoku, Kochi 783-8508, Japan

<sup>‡</sup>School of Environmental Science and Engineering, Kochi University of Technology, Tosayamada, Kami, Kochi 782-8502, Japan

<sup>§</sup>Research Center for Material Science and Engineering, Kochi University of Technology, Tosayamada, Kami, Kochi 782-8502, Japan

\*E-mail: nishiwaki.nagatoshi@kochi-tech.ac.jp.

Tel: +81-887-57-2517, Fax: +81-887-57-2520 (N.N.).

### Tables of Contents

|                                                                             |                     |       |
|-----------------------------------------------------------------------------|---------------------|-------|
| Experimental procedures                                                     |                     | SI-2  |
| Diarylmethanes 3a – 3k                                                      | GC                  | SI-4  |
| Diarylmethanes 4a, 4b, 4d, and 4g                                           | GC                  | SI-15 |
| references                                                                  | GC                  | SI-19 |
| 4'-phenyl-4-[(4-trifluoromethylphenyl)methyl]-1,1'-biphenyl (4c)            | <sup>1</sup> H NMR  | SI-20 |
| Diarylmethanes 3i and 3j                                                    | <sup>13</sup> C NMR | SI-22 |
| 4'-(4-methoxyphenyl)-4-[(4-trifluoromethylphenyl)methyl]-1,1'-biphenyl (4e) | <sup>1</sup> H NMR  | SI-23 |
|                                                                             | <sup>13</sup> C NMR | SI-25 |
| 4-(4-methoxyphenyl)-4'-[(4-trifluoromethylphenyl)methyl]-1,1'-biphenyl (4f) | <sup>1</sup> H NMR  | SI-26 |
|                                                                             | <sup>13</sup> C NMR | SI-28 |

## General

All the reagents and solvents were commercially available and used as received. The  $^1\text{H}$  NMR spectra were measured on a JEOL 400 spectrometer at 400 MHz with TMS as an internal standard. The  $^{13}\text{C}$  NMR spectra were measured on a JEOL 400 spectrometer at 100 MHz. The IR spectra were recorded on a JASCO FT/IR-4100 spectrometer. The melting points were determined on an As-one melting-points apparatus ATM-02, and were uncorrected. The high resolution mass spectra were measured on a JEOL JMS-700N. Gas chromatography (GC) was performed with Shimadzu GC 8A. Flash column chromatography was performed with Wako-gel C-200 (100–200 mesh, Wako). Benzyl carbonates were prepared according to literature procedures.<sup>1</sup>

### General procedure of the Suzuki–Miyaura coupling reaction

To a solution of  $\text{PdCl}_2$  (1.8 mg, 10  $\mu\text{mol}$ ), DPEPhos (5.9 mg, 11  $\mu\text{mol}$ ),  $\text{NaHCO}_3$  (50.2 mg, 0.6 mmol) and phenylboronic acid **2a** (36.6 mg, 0.3 mmol) in ethanol (1.0 mL), benzyl carbonate **1a** (33.2 mg, 0.2 mmol) was added, and the resultant mixture was heated in a screw capped sealed tube at 80 °C for 3 h. After filtration using a Celite pad, the filtrate was extracted with hexane (10 mL x 3). The combined organic layer was washed with brine (10 mL x 1), dried over  $\text{MgSO}_4$ , and concentrated under reduced pressure. The residue was treated with flash column chromatography (EtOAc/hexane = 90/10) to afford the coupling product **3a** (26.5 mg, 0.158 mmol, 79%).

When other conditions and substrates were employed, the experiments were conducted in a similar way.

### **Screening of the reaction conditions**

When the reaction conditions were screened, the experiments were conducted in a similar way with the last section except for the column chromatography. The yield was determined by GC by calibration curve that was prepared beforehand using naphthalene as an internal standard.

### **Structural confirmation of the products**

All products except for **7** and **8** are known compounds. The structures of products were confirmed by comparing the  $^1\text{H}$  NMR spectra with those of authentic samples. The purity of the isolated products was confirmed by gas chromatography as shown in next pages (the large peak within 1 min. retention time belongs to the solvent (AcOEt)).

GC conditions

Gas (flow rate):  $\text{N}_2$  (60 mL/min),  $\text{H}_2$ (50 mL/min), Air (500 mL/min)

Carrier gas:  $\text{N}_2$

Temperature: Injector 250 °C, Column 180–230 °C

Column: Glass column with 3 mm diameter and 3 m length

Packed with Silicone DC550/20%

Detection: FID

**Figure S1. Compound 3a<sup>2</sup>**

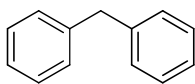

**3a**

Colorless oil

Injector 250 °C / Column 180 °C

Retention time of **3a**: 3.682 min

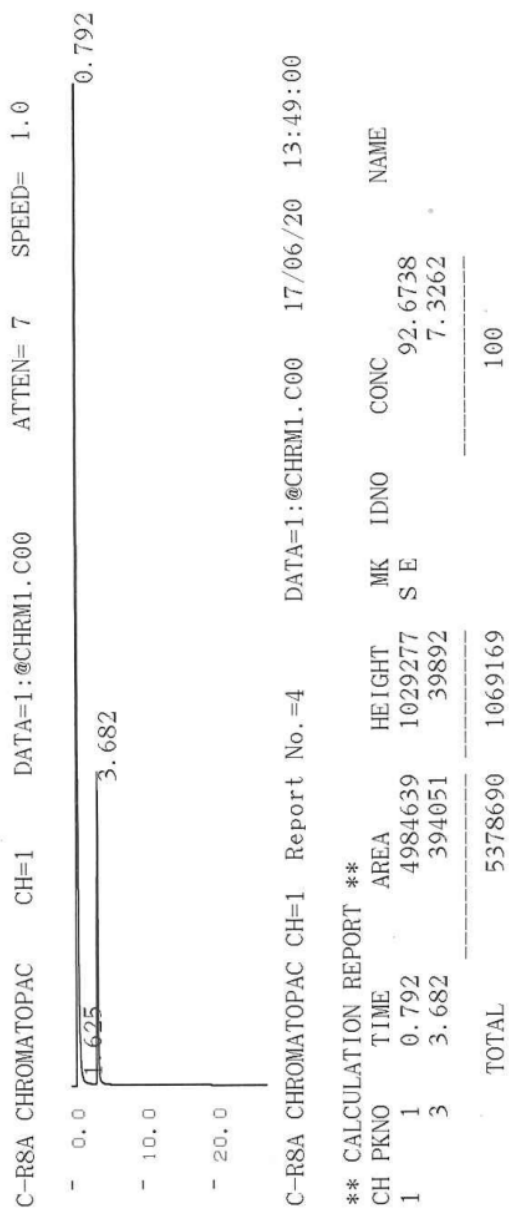

Figure S2. Compound **3b**<sup>2</sup>

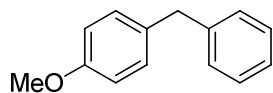

**3b**

Colorless oil

Injector 250 °C / Column 180 °C

Retention time of **3b**: 12.222 min

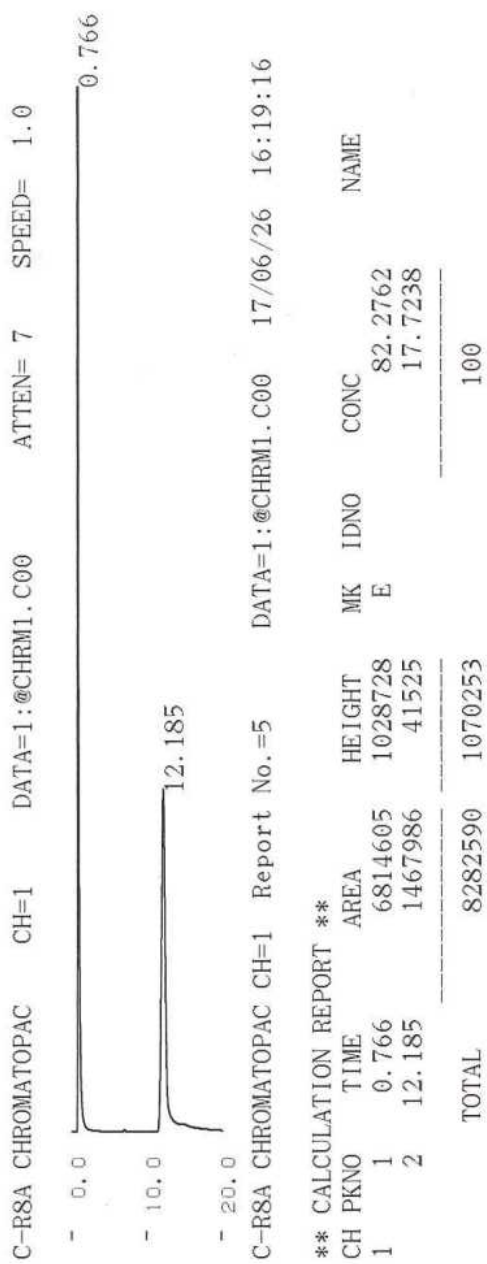

Figure S3. Compound 3c<sup>2</sup>

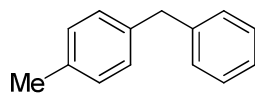

3c

Colorless oil

Injector 250 °C / Column 180 °C

Retention time of 3c: 5.181 min

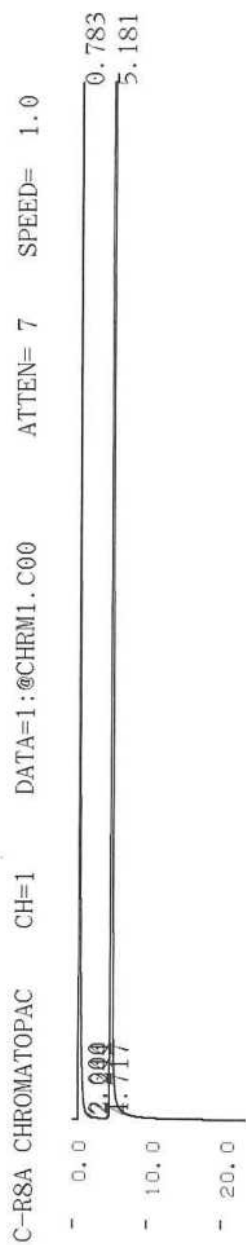

C-RSA CHROMATOPAC CH=1 Report No.=8 DATA=1:@CHRM1.C00 17/06/20 15:29:56

\*\* CALCULATION REPORT \*\*

| CH PKNO | TIME  | AREA    | HEIGHT  | MK | IDNO | CONC    | NAME    |         |
|---------|-------|---------|---------|----|------|---------|---------|---------|
| 1       | 0.783 | 4501025 | 1028659 | S  | E    | 55.9282 |         |         |
| 3       | 2.244 | 1435    | 301     | T  |      | 0.0178  |         |         |
| 4       | 4.717 | 2672    | 253     |    |      | 0.0332  |         |         |
| 5       | 5.181 | 3542727 | 261150  | V  |      | 44.0207 |         |         |
| TOTAL   |       |         |         |    |      |         | 8047858 | 1290362 |
|         |       |         |         |    |      |         |         | 100     |

**Figure S4. Compound 3d<sup>2</sup>**

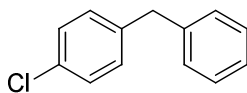

**3d**

Colorless oil

Injector 250 °C / Column 180 °C

Retention time of **3d**: 7.670 min

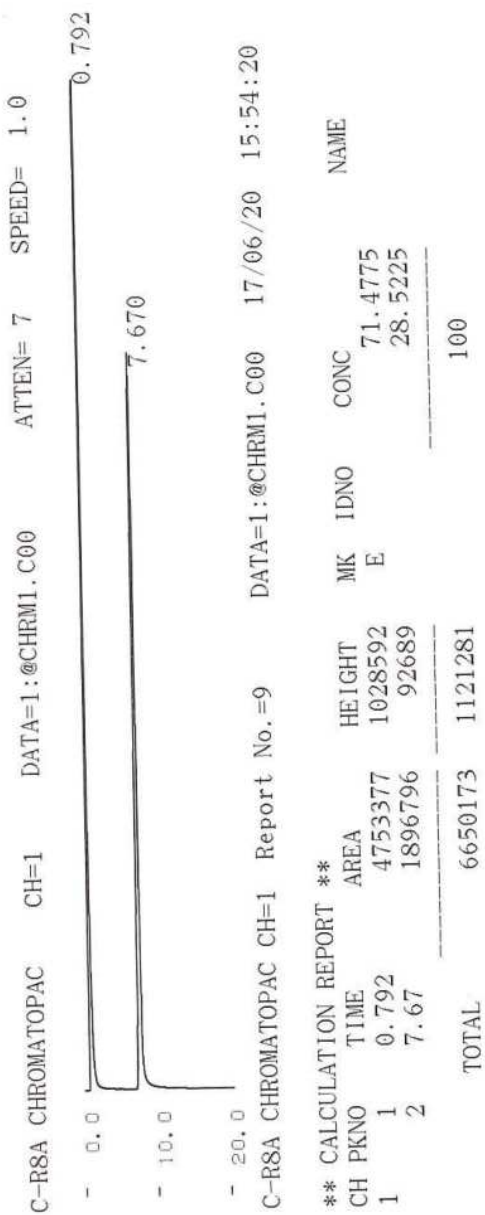

**Figure S5. Compound 3e<sup>2</sup>**

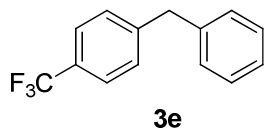

Colorless oil

Injector 250 °C / Column 180 °C

Retention time of **3e**: 3.214 min

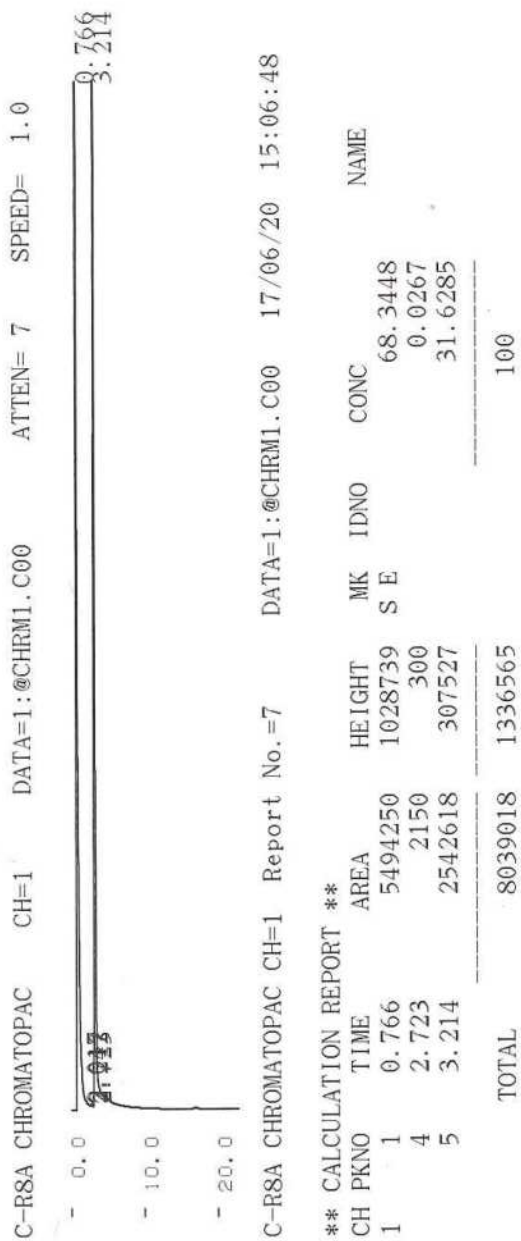



Figure S6. Compound 3f<sup>3</sup>

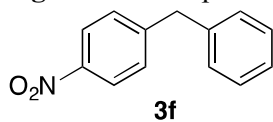

Colorless Oil

Injector 250 °C / Column 230 °C

Retention time of 3f: 9.018 min

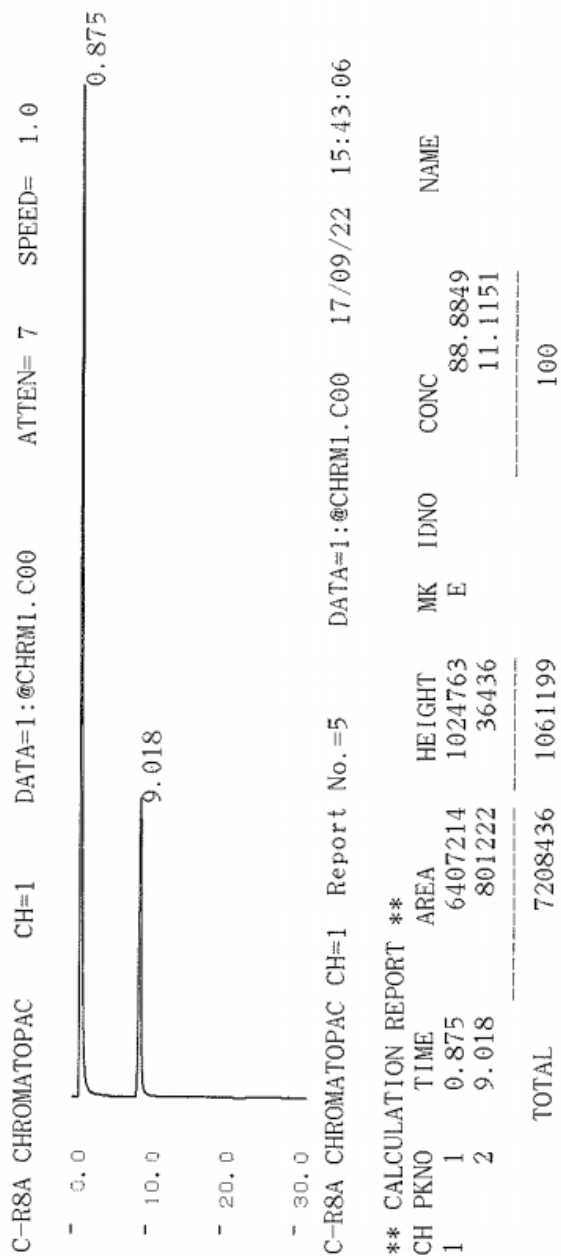

Figure S7. Compound **3g**<sup>4</sup>

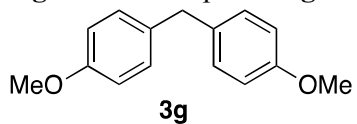

Colorless oil

Injector 250 °C / Column 200 °C

Retention time of **3f**: 14.559 min

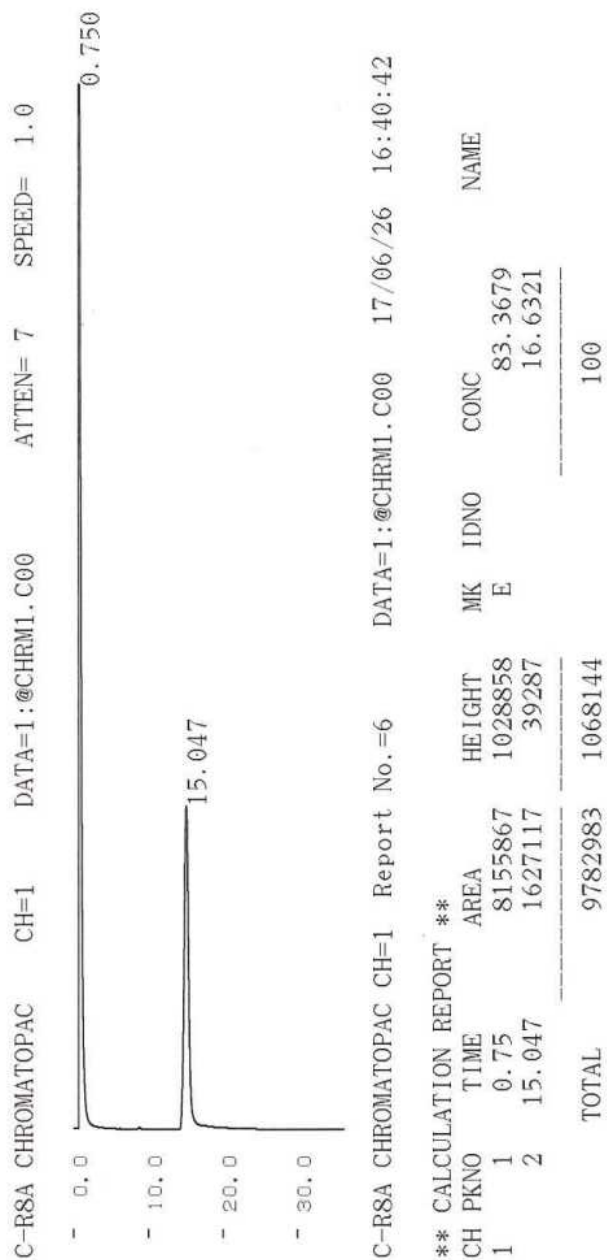

**Figure S8.** Compound **3h**<sup>5</sup>

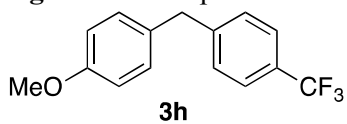

Colorless oil

Injector 250 °C / Column 180 °C

Retention time of **3h**: 9.090 min

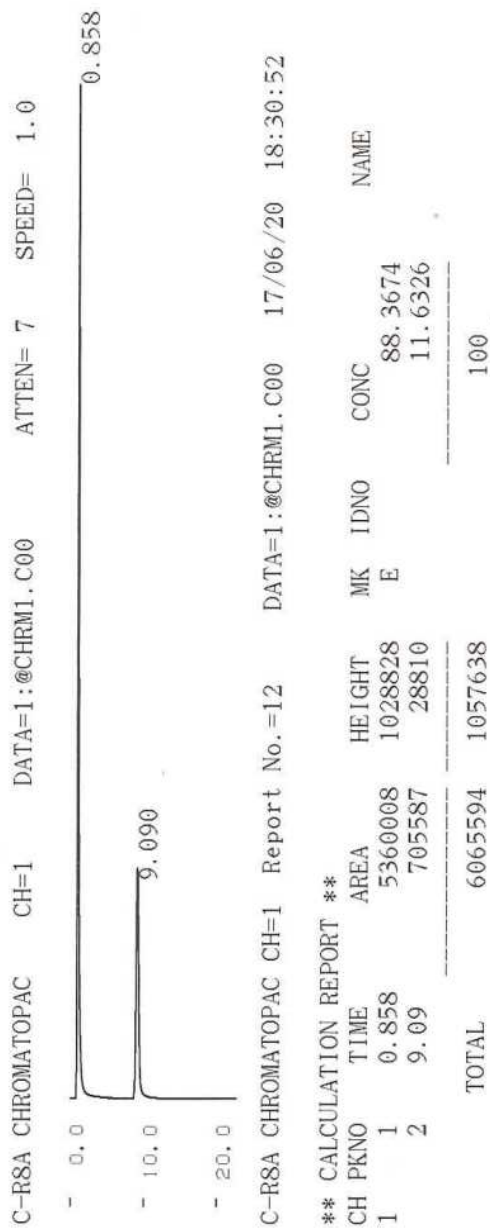

Figure S9. Compound 3i<sup>6</sup>

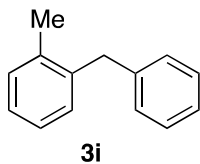

Colorless oil

Injector 250 °C / Column 180 °C

Retention time of **3i**: 5.108 min

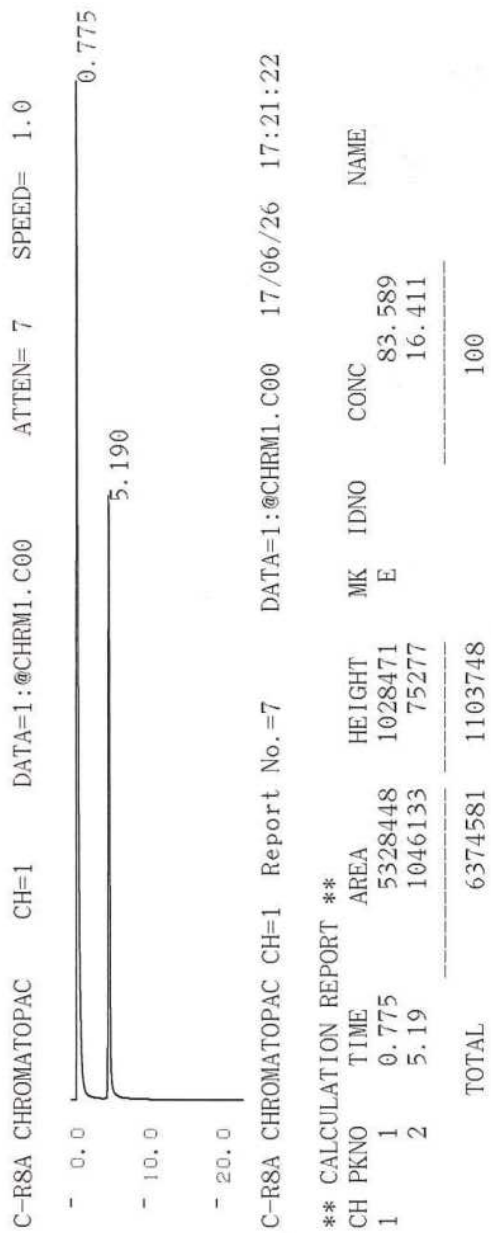

**Figure S10.** Compound **3j**<sup>5</sup>

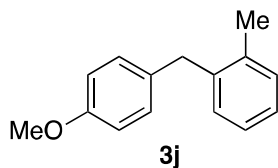

Colorless oil

Injector 250 °C / Column 180 °C

Retention time of **3j**: 10.715 min

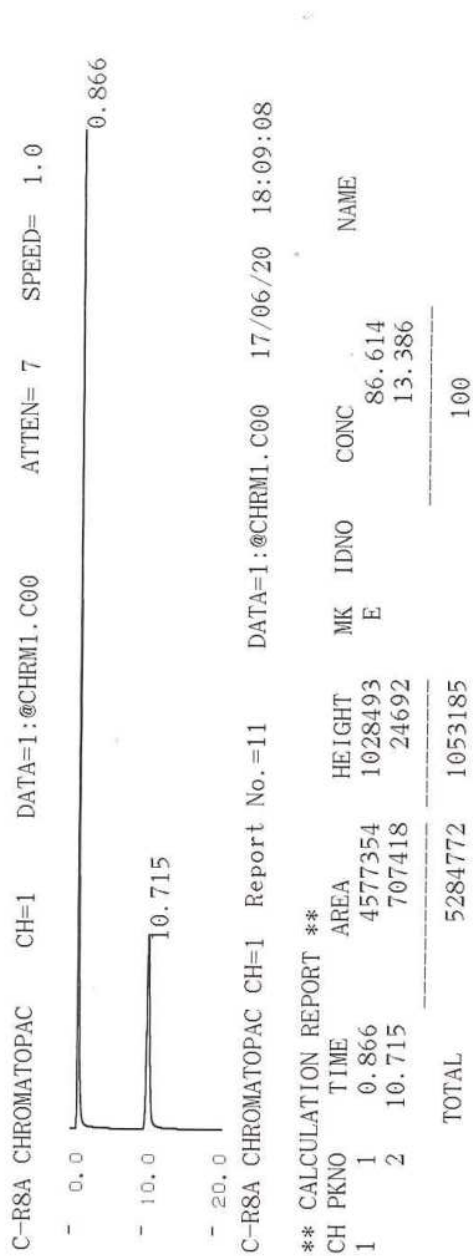

**Figure S11.** Compound **3k**<sup>2</sup>

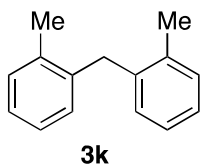

Colorless oil

Injector 250 °C / Column 180 °C

Retention time of **3k**: 6.383 min

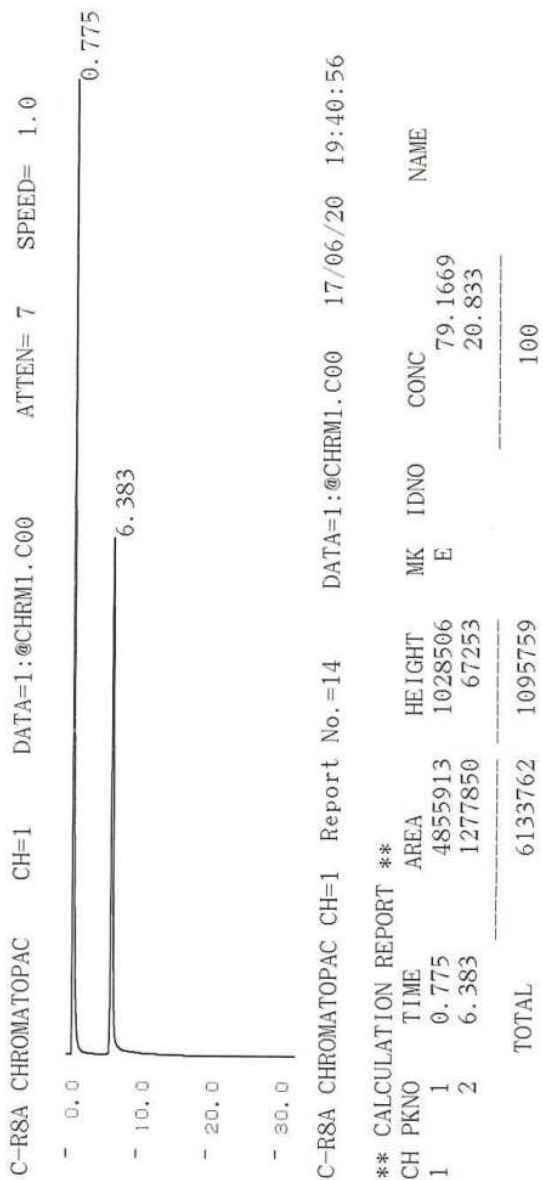

**Figure S12.** Compound **4a**<sup>7</sup>

White solid

Injector 250 °C / Column 240 °C

Retention time of **4a**: 27.138 min

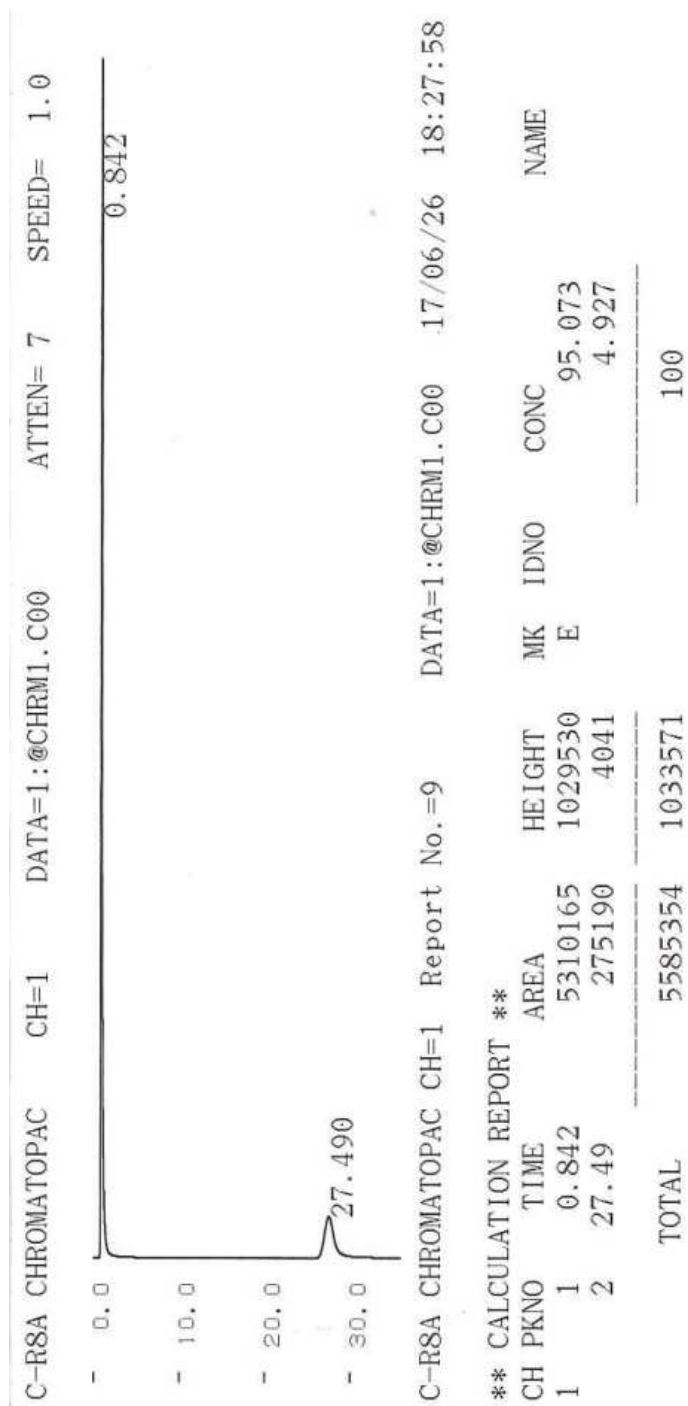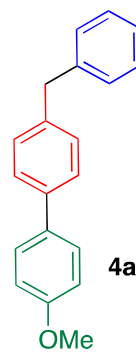

**Figure S13.** Compound **4b**<sup>8</sup>

White solid

Injector 250 °C / Column 240 °C

Retention time of **4b**: 26.255 min

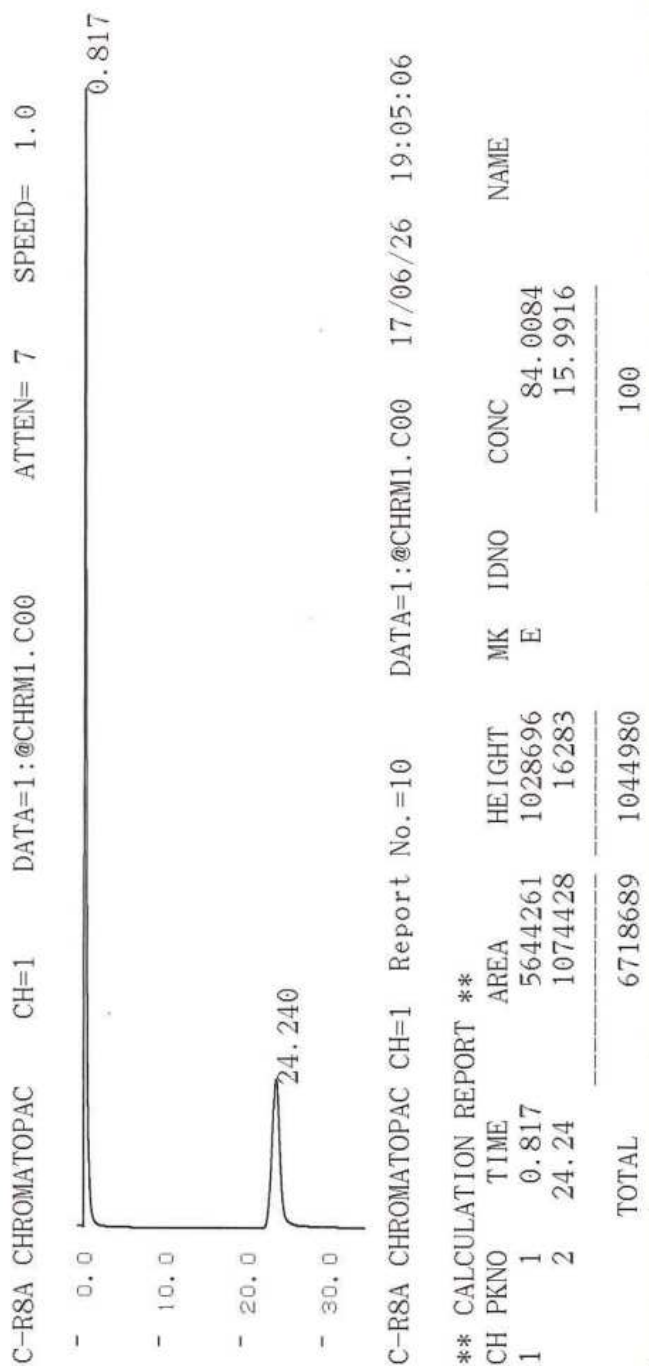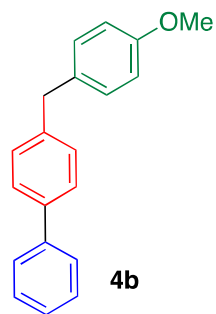



**Figure S14. Compound 4d<sup>9</sup>**

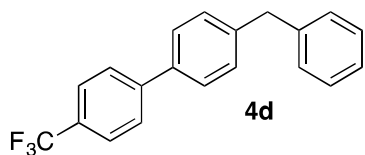

White solid

Injector 250 °C / Column 230 °C

Retention time of **4d**: 22.662 min

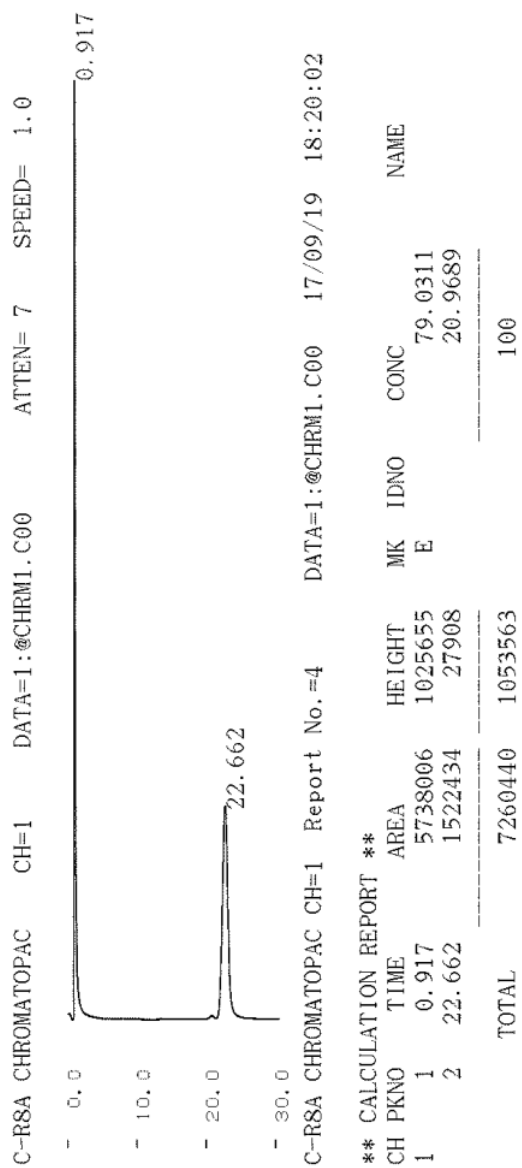

**Figure S15. Compound 4g<sup>10</sup>**

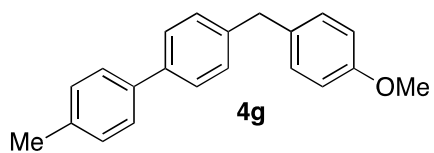

White solid

Injector 250 °C / Column 240 °C

Retention time of **4g**: 22.662 min

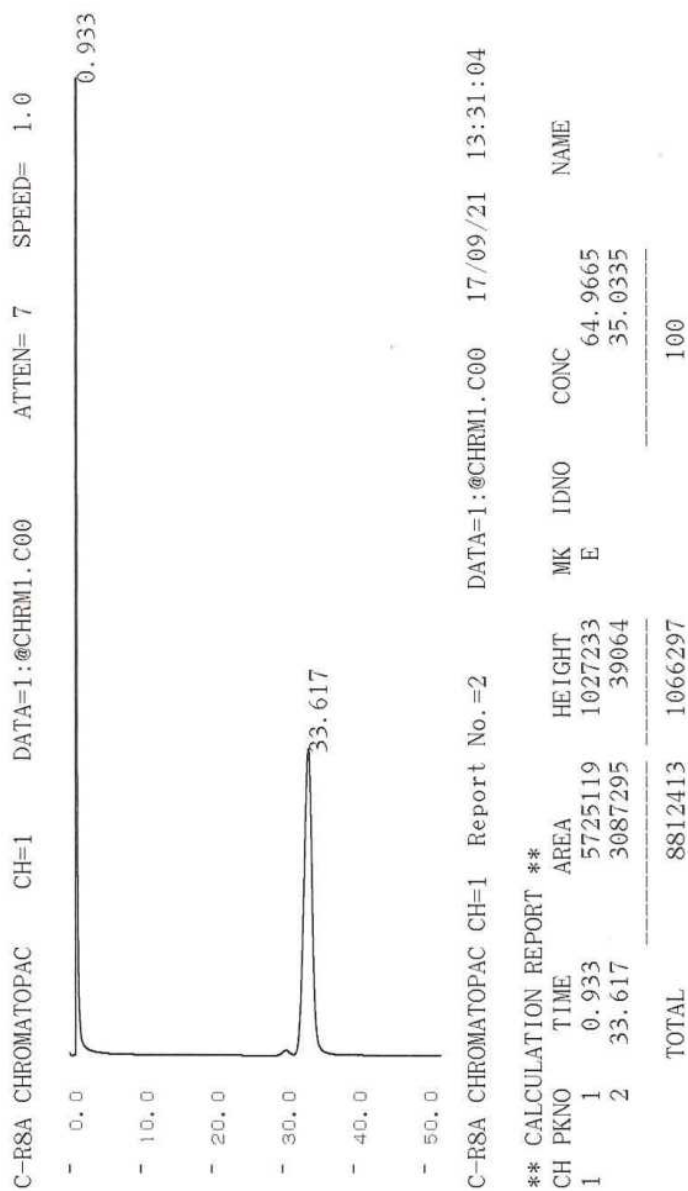

## References

- (1) Selva, M.; Benedet, V.; Fabris, M. *Green Chem.* **2012**, *14*, 188
- (2) Pal, S.; Chowdhury, S.; Rozwadowski, E.; Auffrant, A.; Gosmini, C. *Adv. Synth. Cat.* **2016**, *358*, 2431–2435.

- (3) Singh, M. K.; Lakshman, M. K. *ChemCatChem* **2015**, *7*, 4156–4162.
- (4) Ueda, M.; Nakakoji, D.; Kuwahara, Y.; Nishimura, K.; Ryu, I. *Tetrahedron Lett.* **2016**, *57*, 4142–4144.
- (5) Zhang, J.; Gusheng, G.; Xu, J.; Sun, H.; Shen, Q. *Org. Lett.* **2016**, *18*, 2860–2863.
- (6) Zhu, J.; Perez, M.; Douglas, D. W. *Angew. Chem. Int. Ed.* **2016**, *55*, 8448–8451.
- (7) Ronson, T. O.; Carney, J. R.; Whitwood, A. C.; Taylor, R. J. K.; Fairlamb, I. J. S. *Chem. Commun.* **2015**, *51*, 3466–3469.
- (8) Wang, X.-X.; Luo, M.-J.; Lu, J.-M. *Org. Biomol. Chem.* **2015**, *13*, 11438–11444.
- (9) Kim, W.-K.; Jang, J.-H.; Jo, H.; Park, K. *ACS Comb. Sci.* **2014**, *16*, 225–231.
- (10) Rao, M. L. N.; Dhanorkar, R. J. *RSC Adv.* **2013**, *3*, 6794–6798.

4'-phenyl-4-[(4-trifluoromethylphenyl)methyl]-1,1'-biphenyl (4c) (CDCl<sub>3</sub>)

Figure S16.

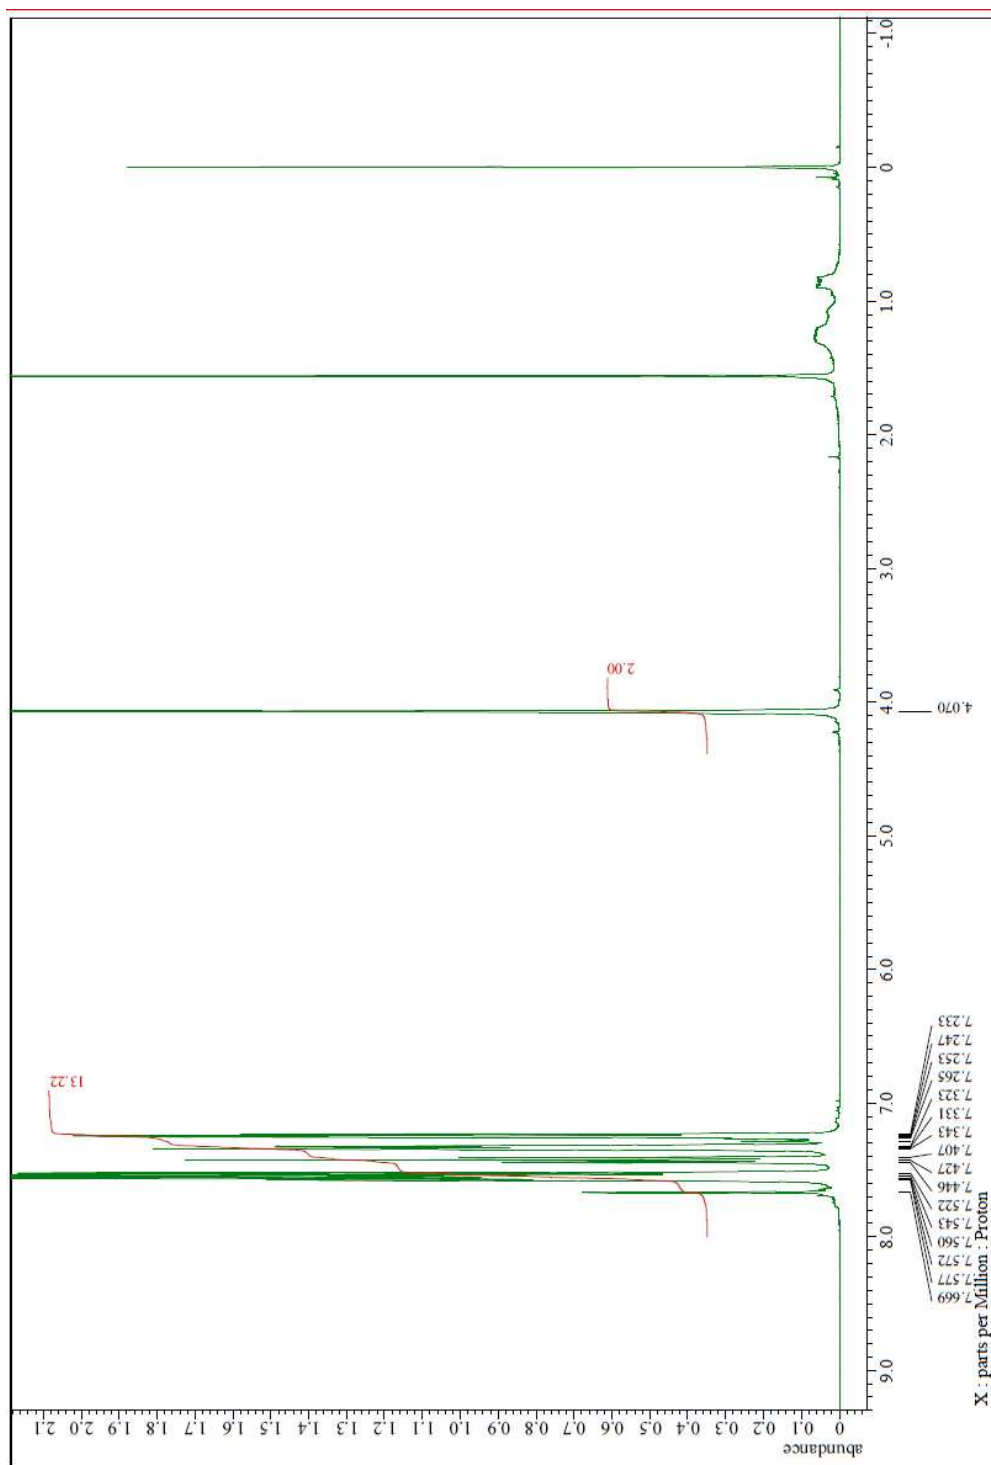

Figure S17.

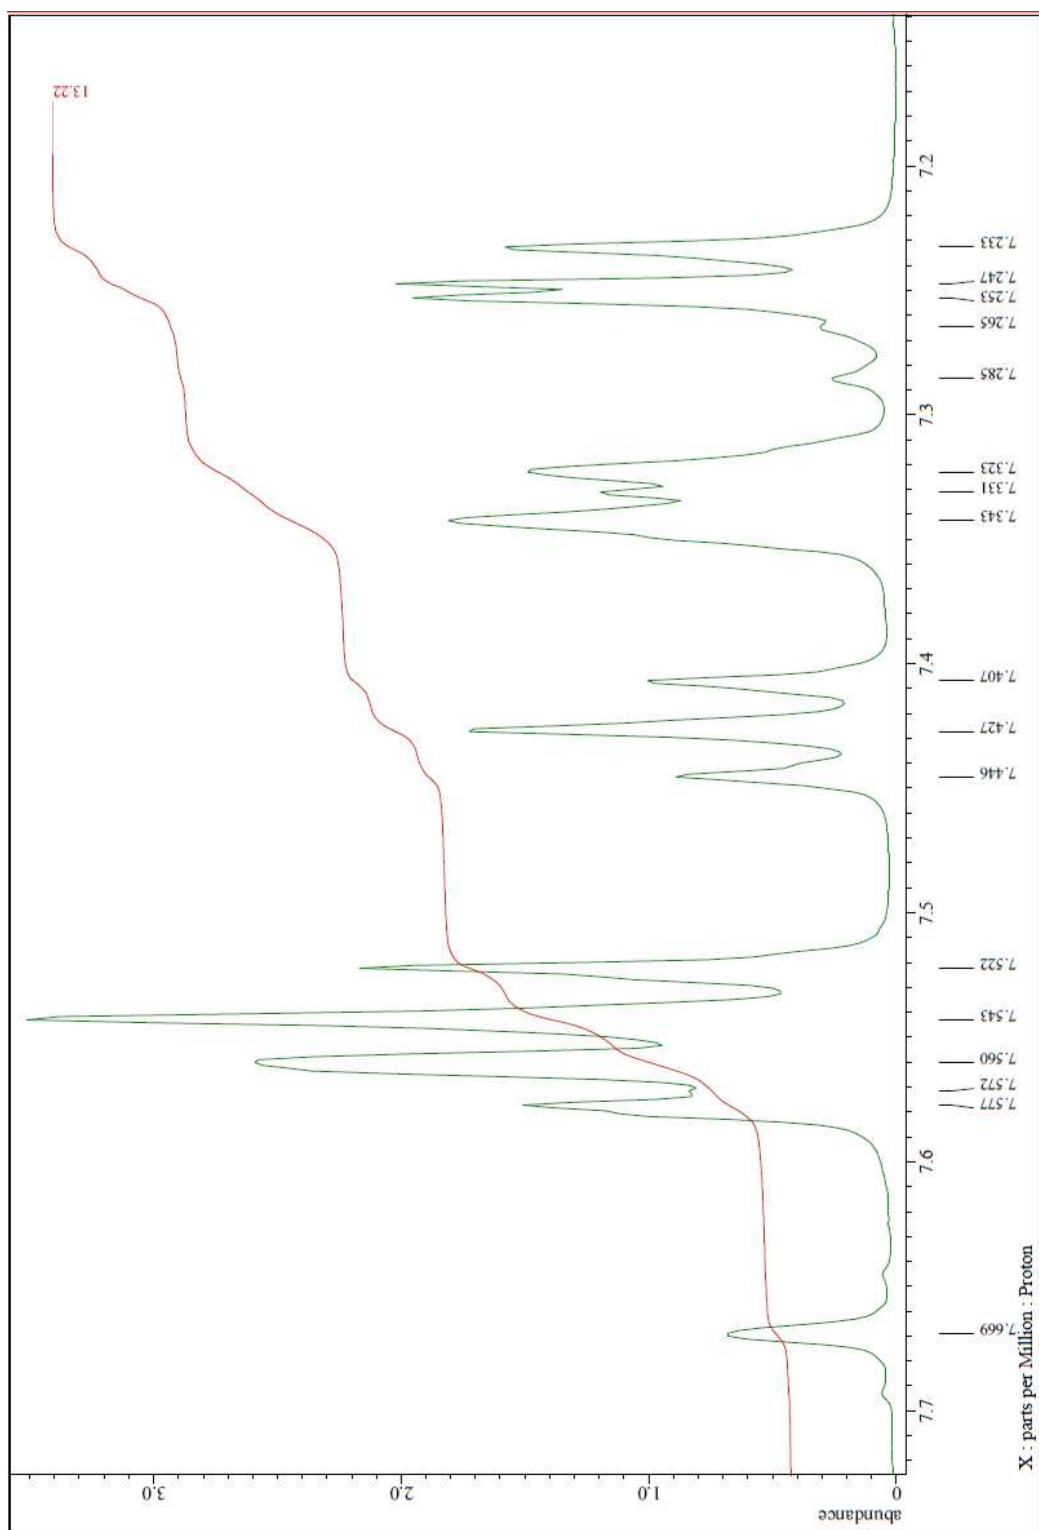

Figure S18.

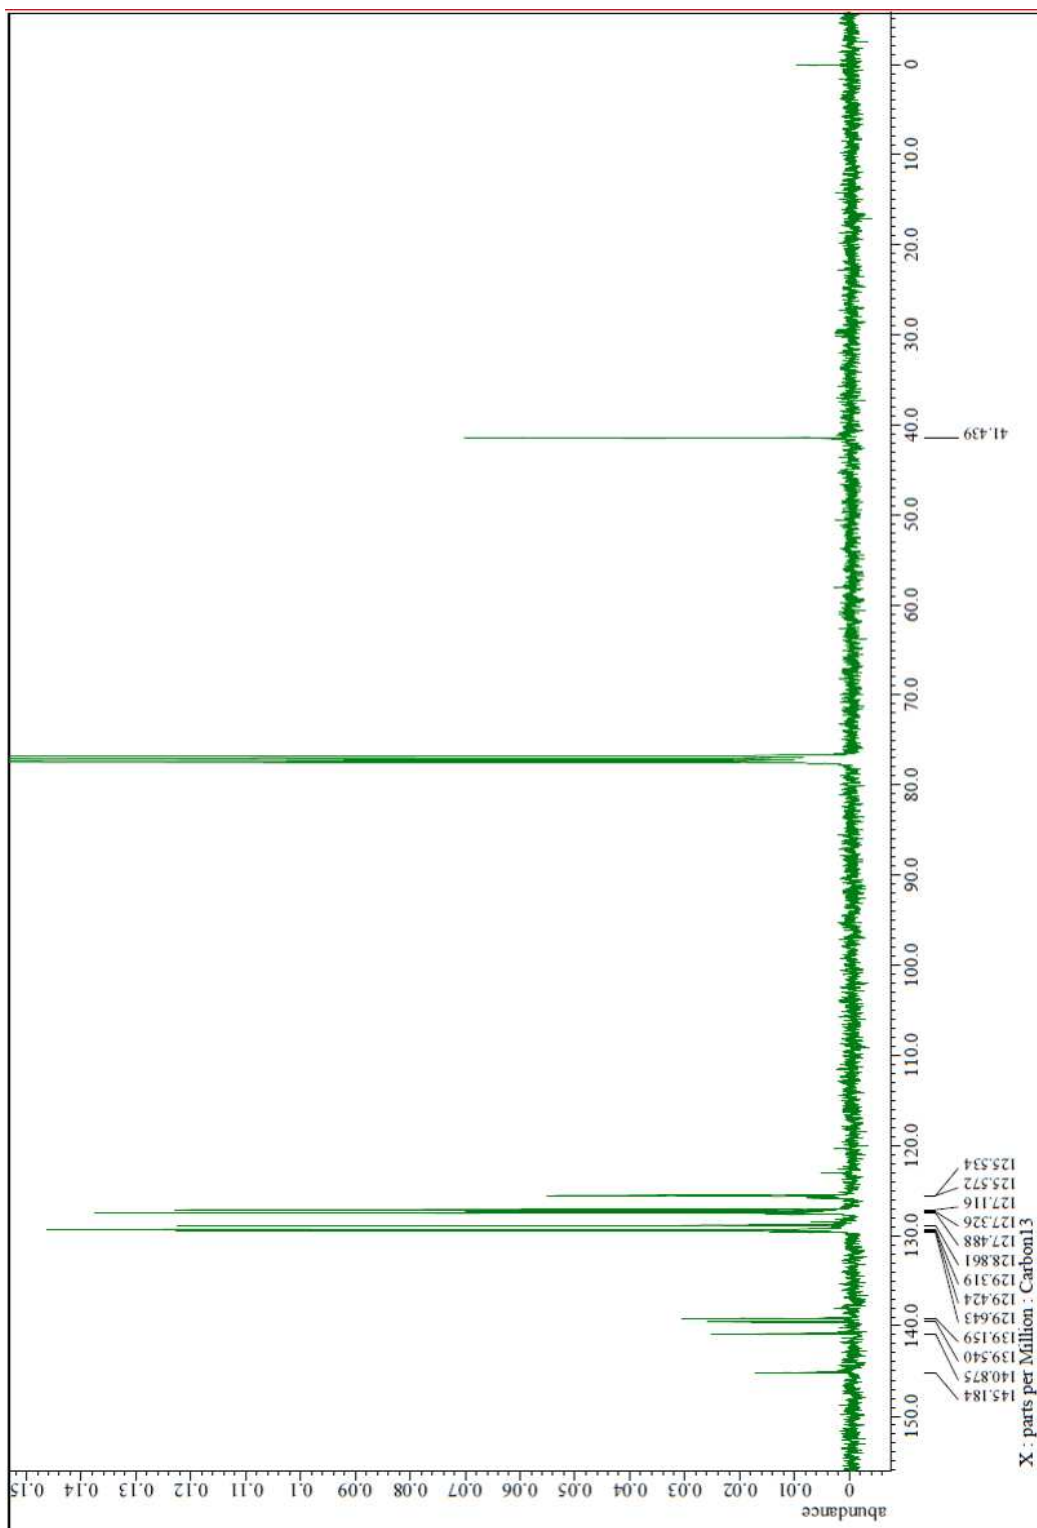

4'-(4-methoxyphenyl)-4-[(4-trifluoromethylphenyl)methyl]-1,1'-biphenyl (4e)  
(CDCl<sub>3</sub>)

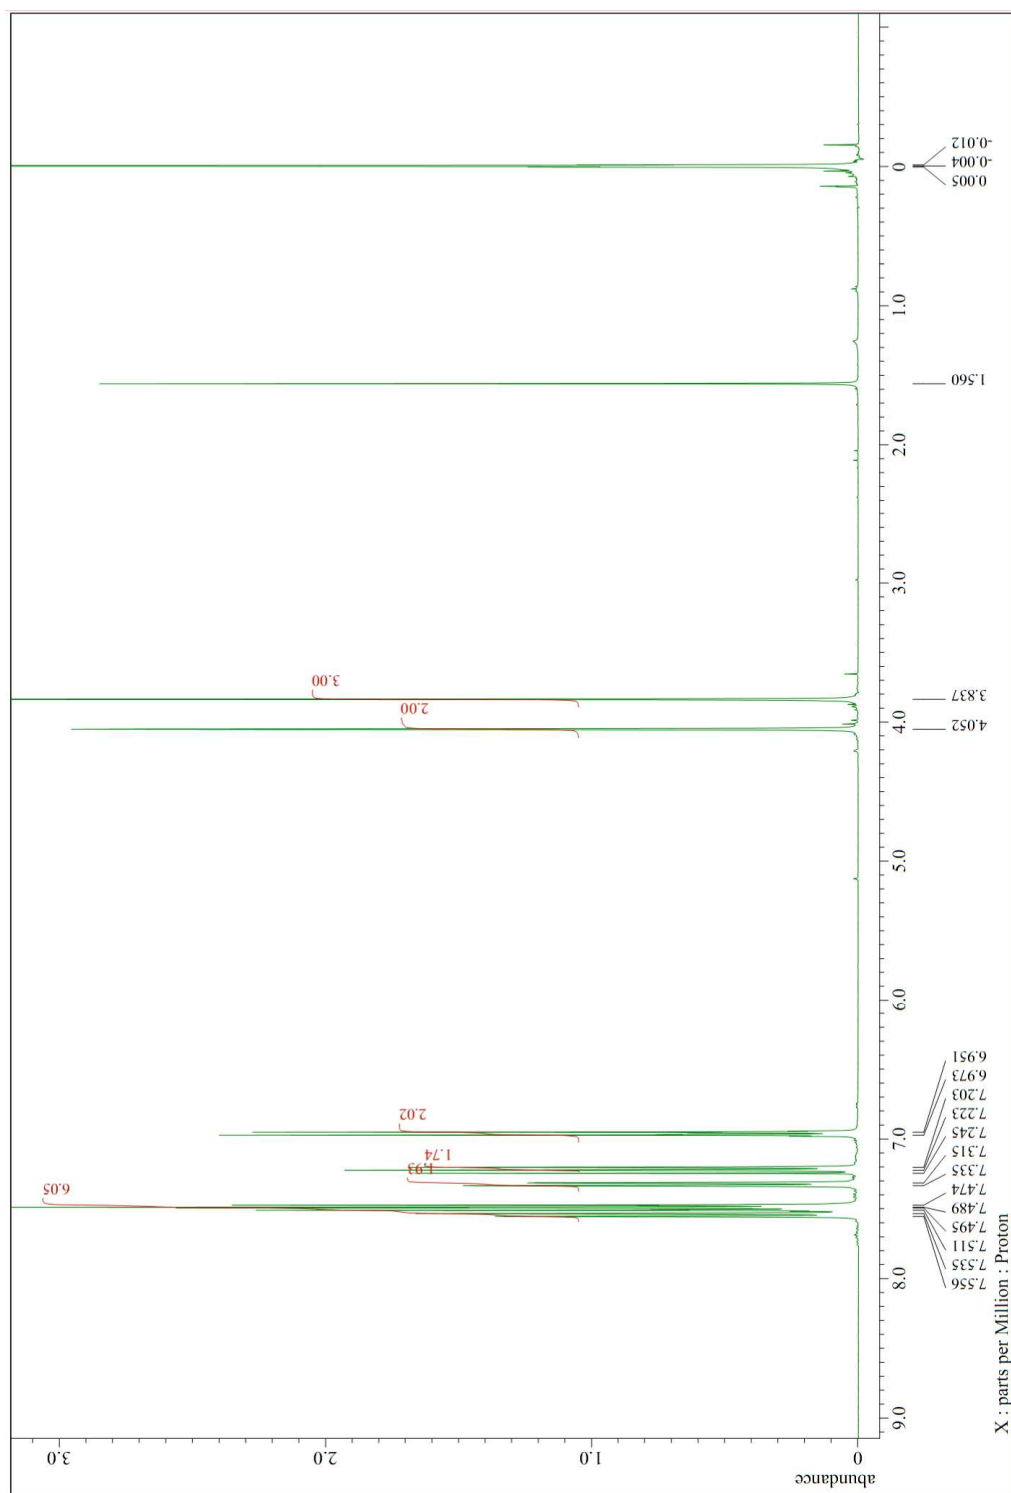

Figure S19.





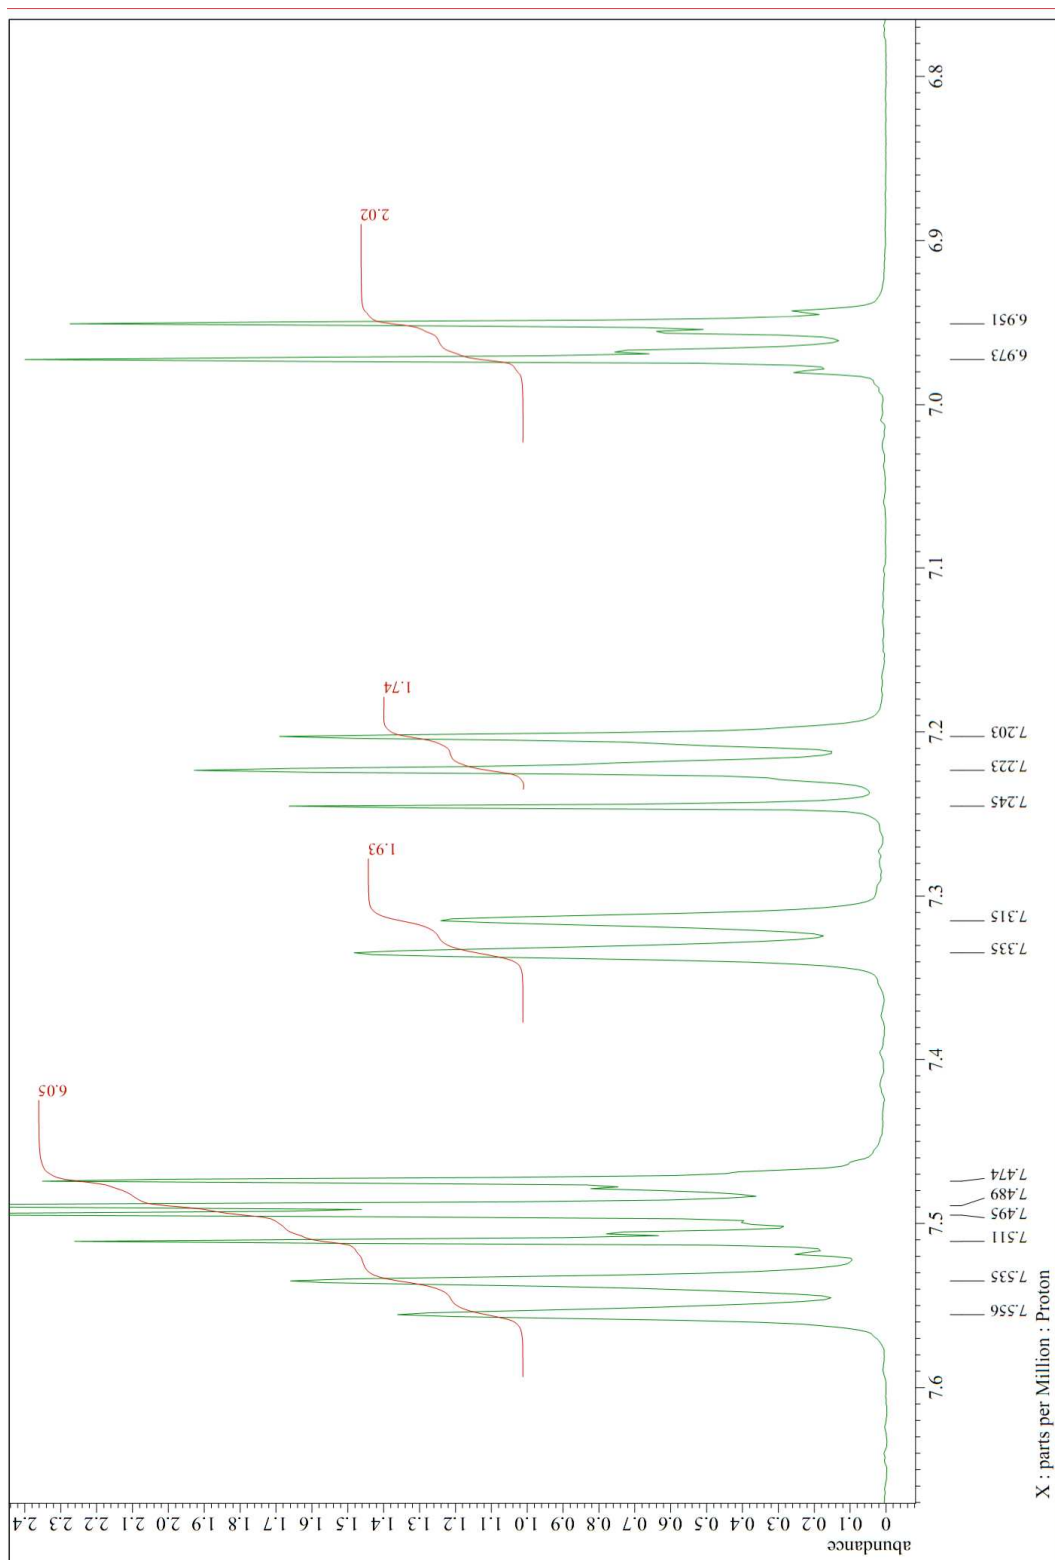

Figure S20.



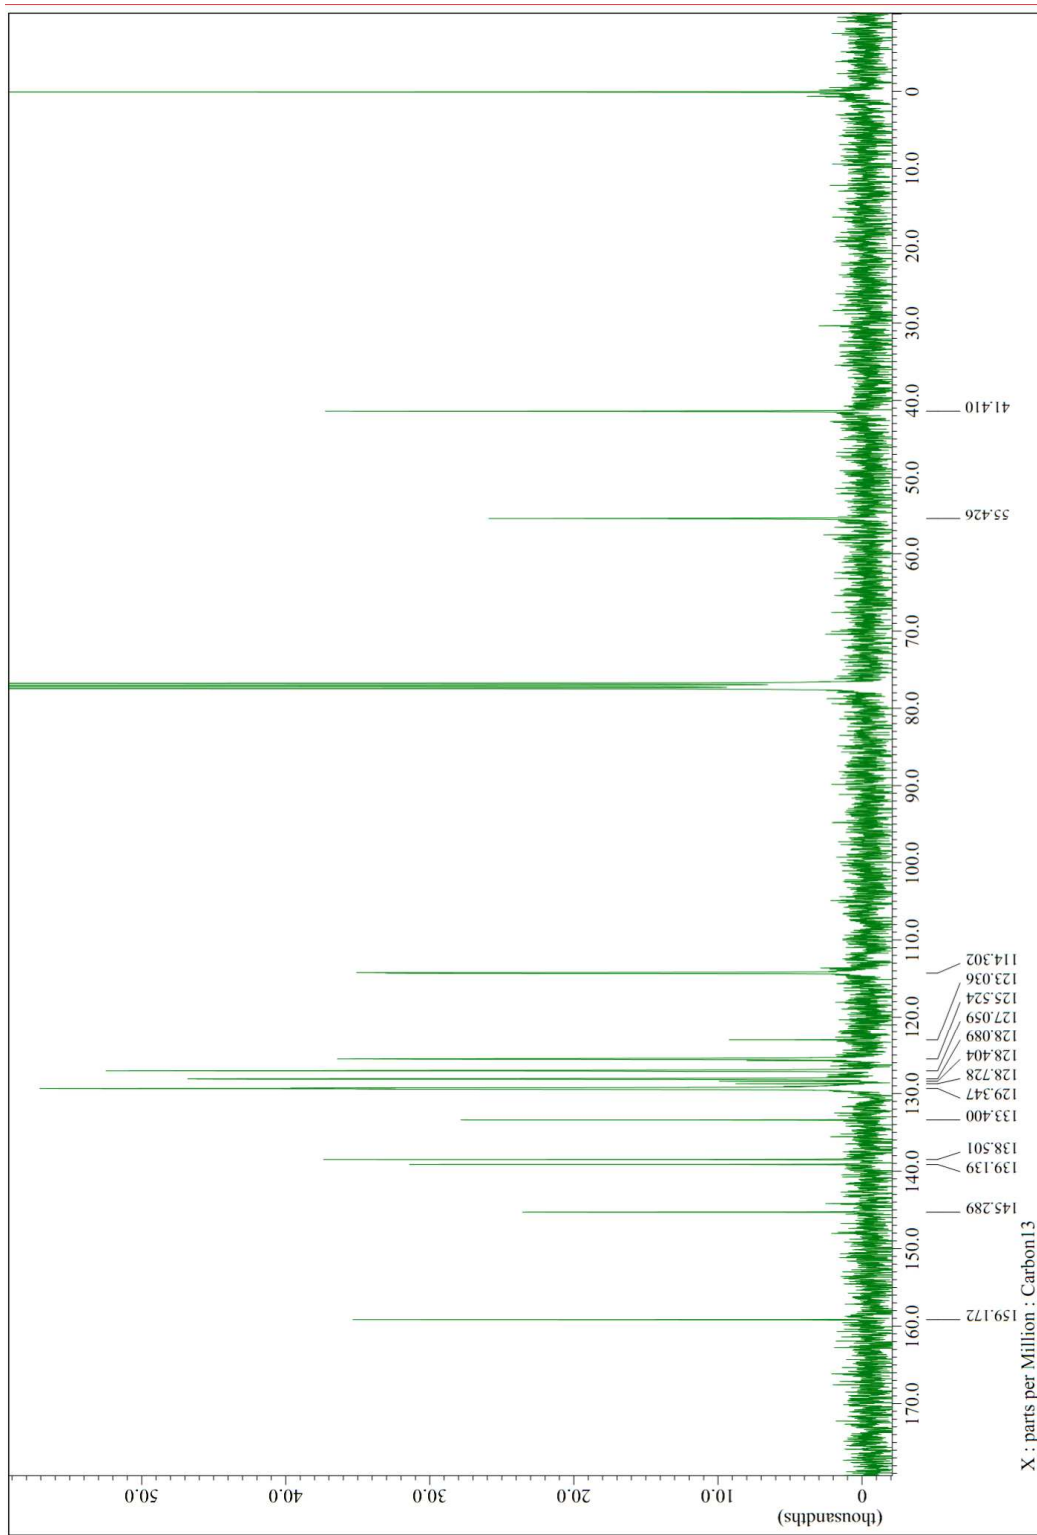

Figure S21.



**4-(4-methoxyphenyl)-4'-[(4-trifluoromethylphenyl)methyl]-1,1'-biphenyl (4f)**  
(CDCl<sub>3</sub>)  
**Figure S22.**

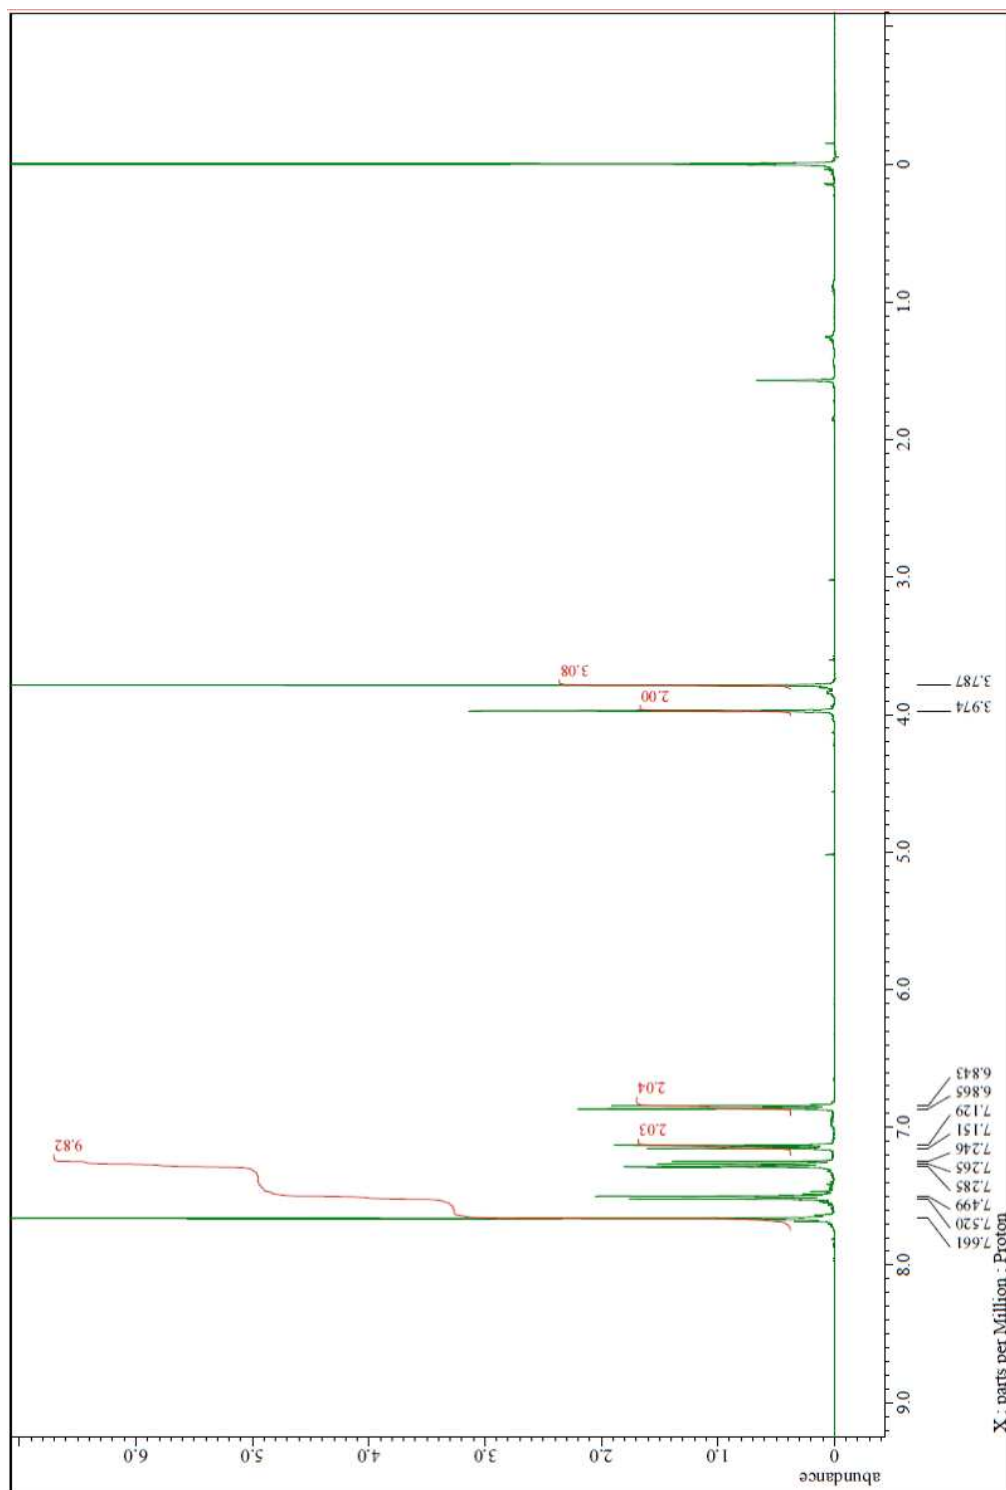

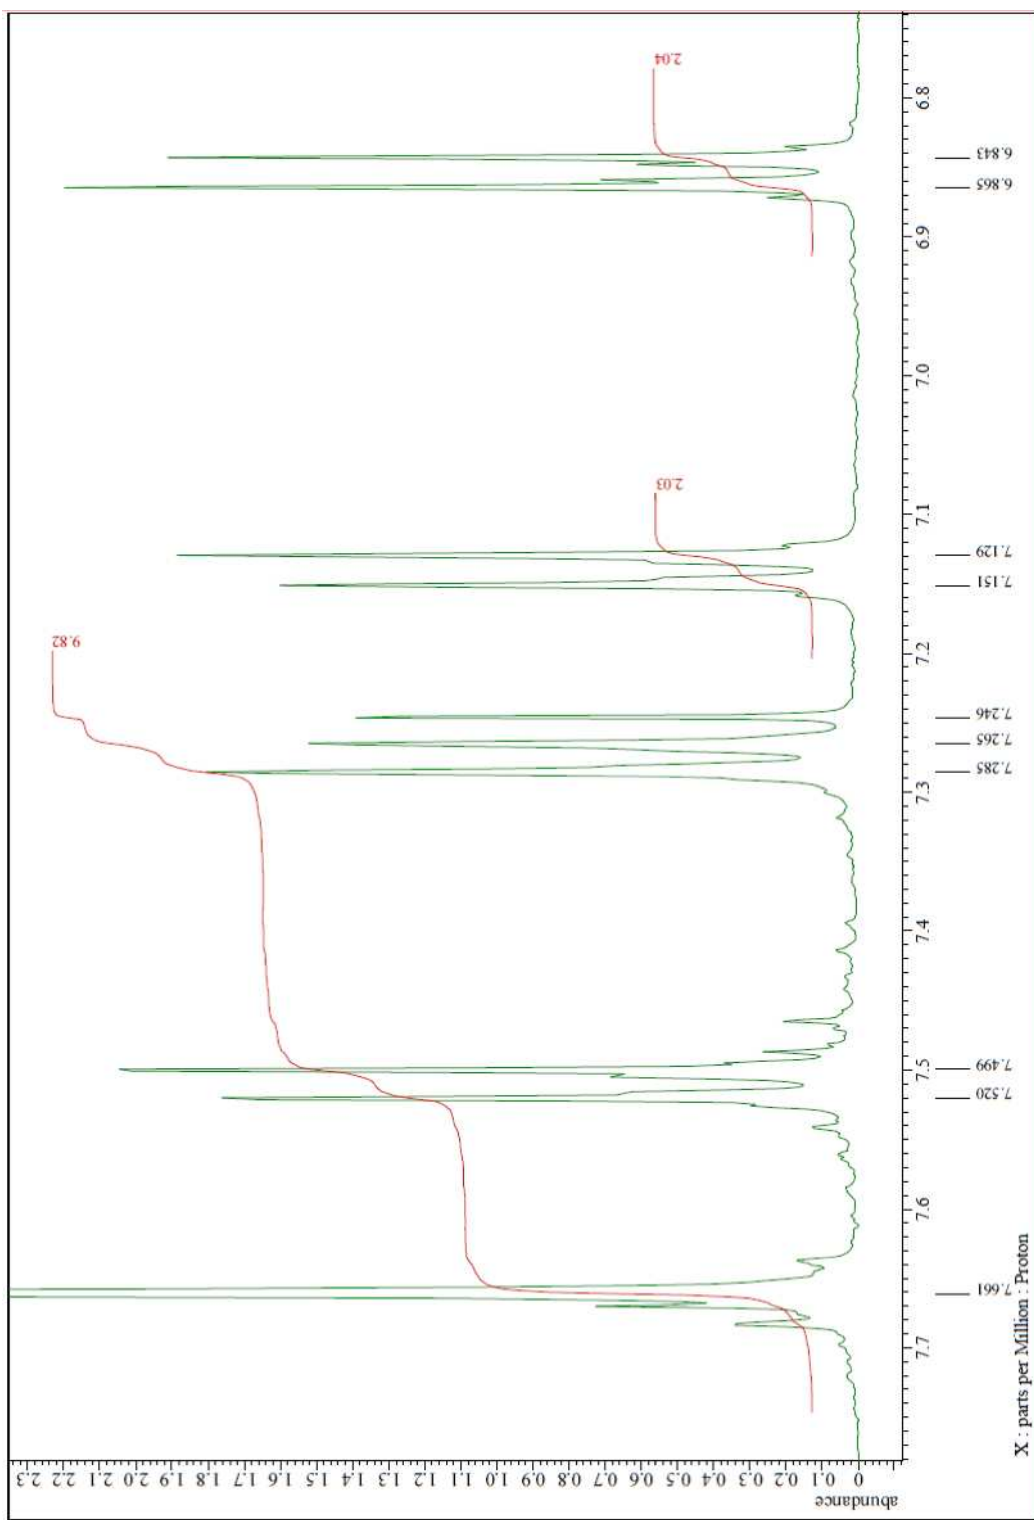

Figure S23.

Figure S24.

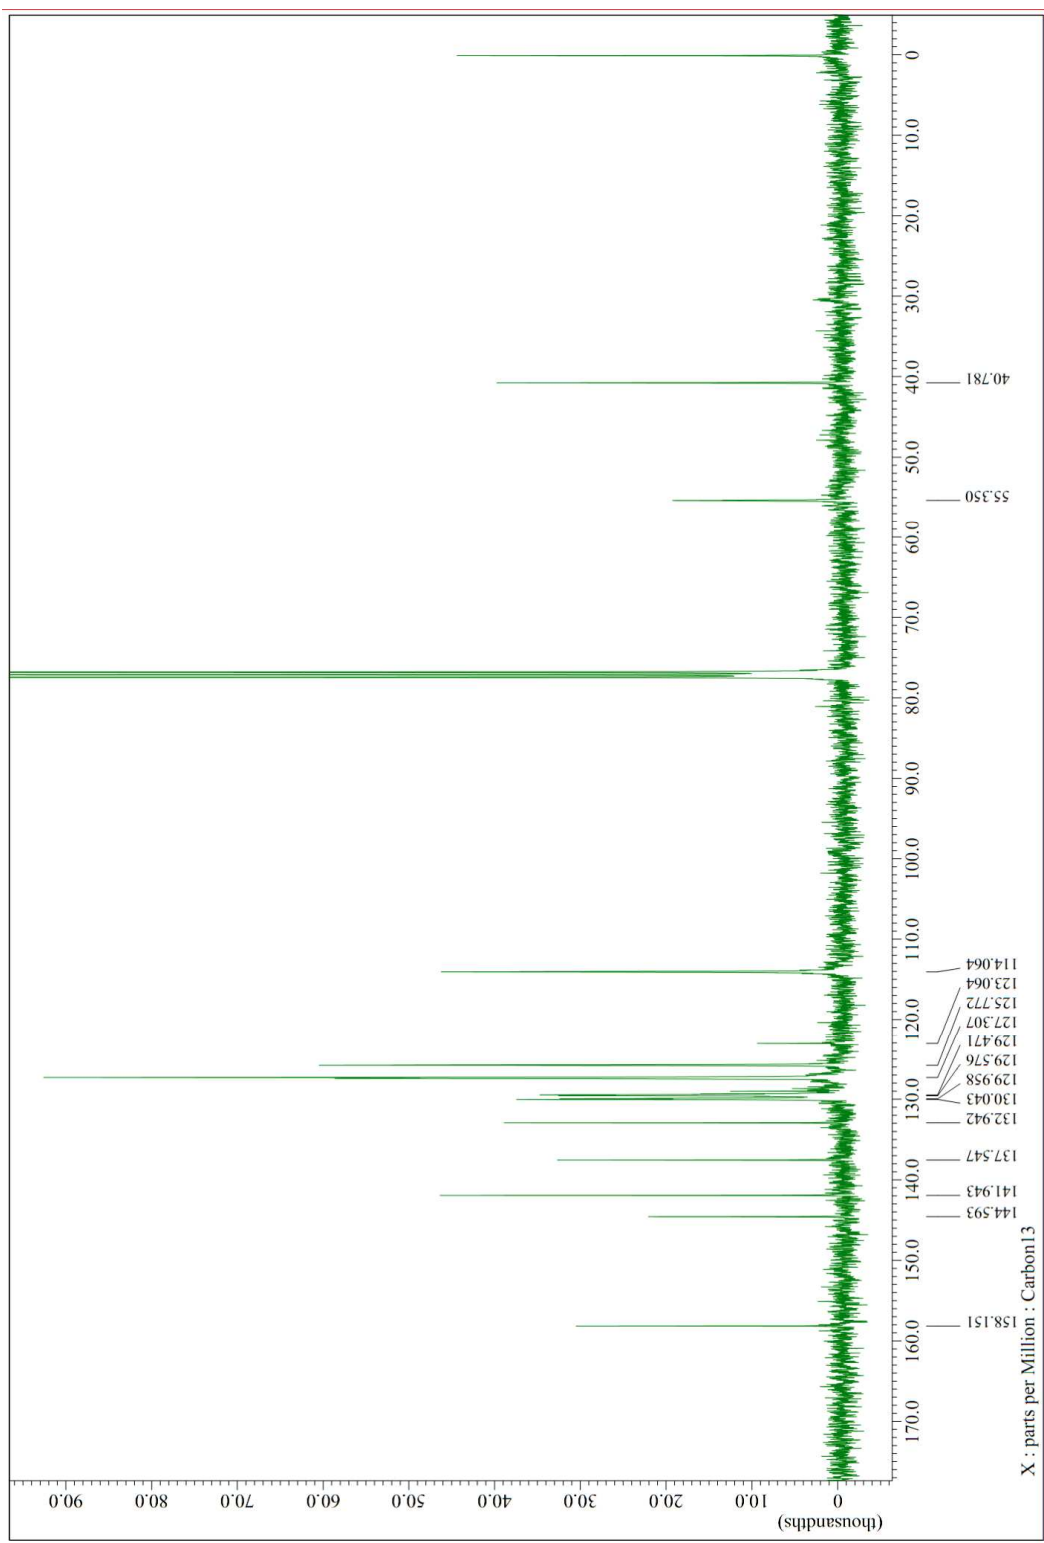

Supplement: ao7b01450_si_001.pdf [file ao7b01450_si_001.pdf]
